# Supplementary material for: Aedes albopictus D7 Salivary Protein Prevents Host Hemostasis and Inflammation
Source: PubMed Central journal article supplement (PMC7601585; doi:10.3390/biom10101372), 2020-09-27
Supplement: biomolecules-10-01372-s001.pdf [file biomolecules-10-01372-s001.pdf]

## Supplementary figures

Supplementary Fig. 1.

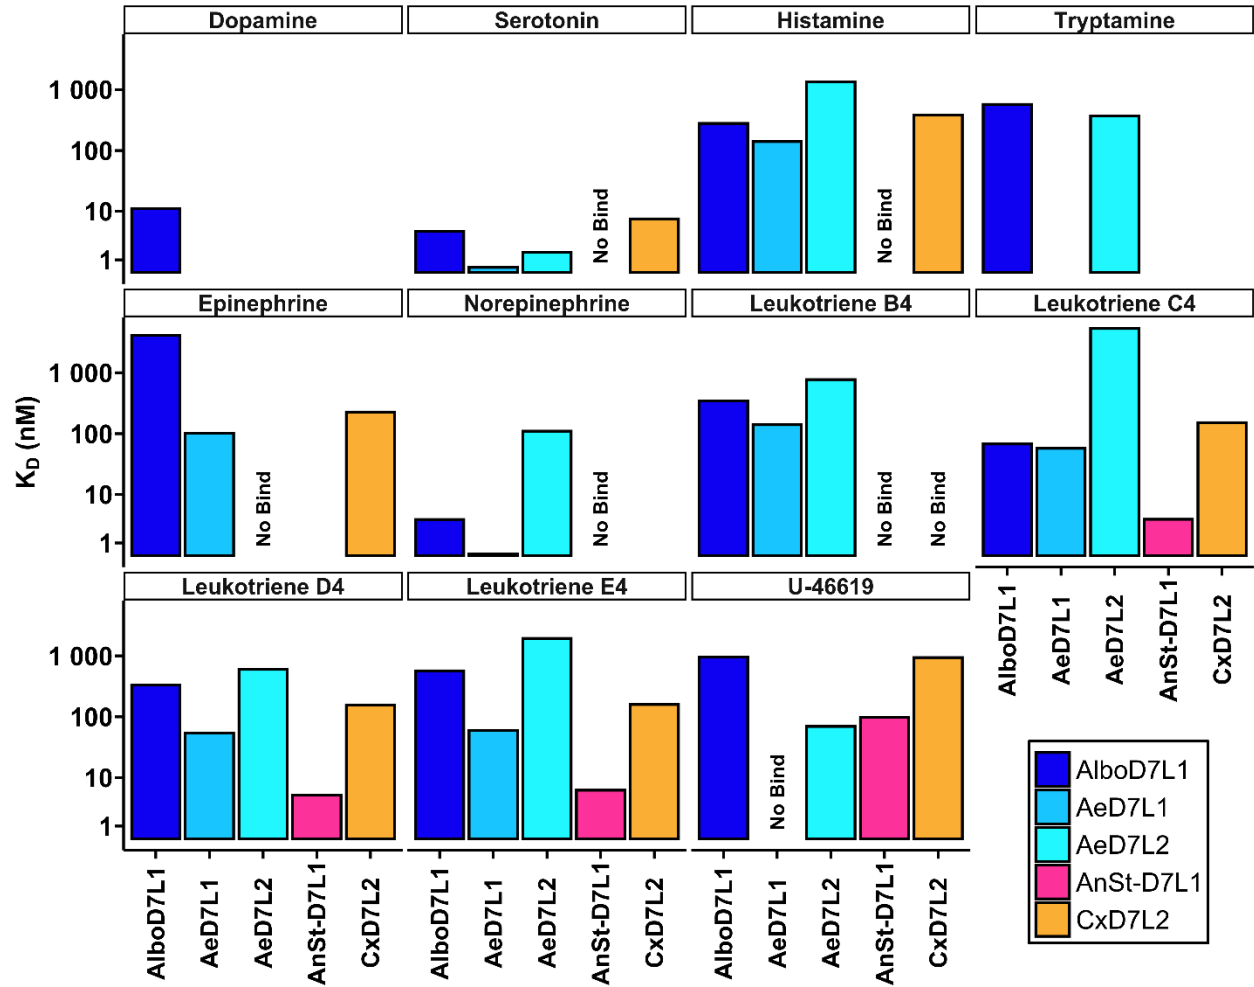

**Supplementary Fig. 1.** Comparison of binding affinities of several mosquito D7 salivary proteins to biogenic amines and biolipids involved in hemostasis. The equilibrium dissociation constant ( $K_D$ ) of AeD7L1 [1,2], AeD7L2 [3], AlboD7L1 (represented in blue), CxD7L2 [4], and AnSt-D7L1 [5] are reported. A “No bind” designation represents no protein-ligand binding and blank bar space indicates binding affinity has not been tested.

Supplementary Fig. 2.

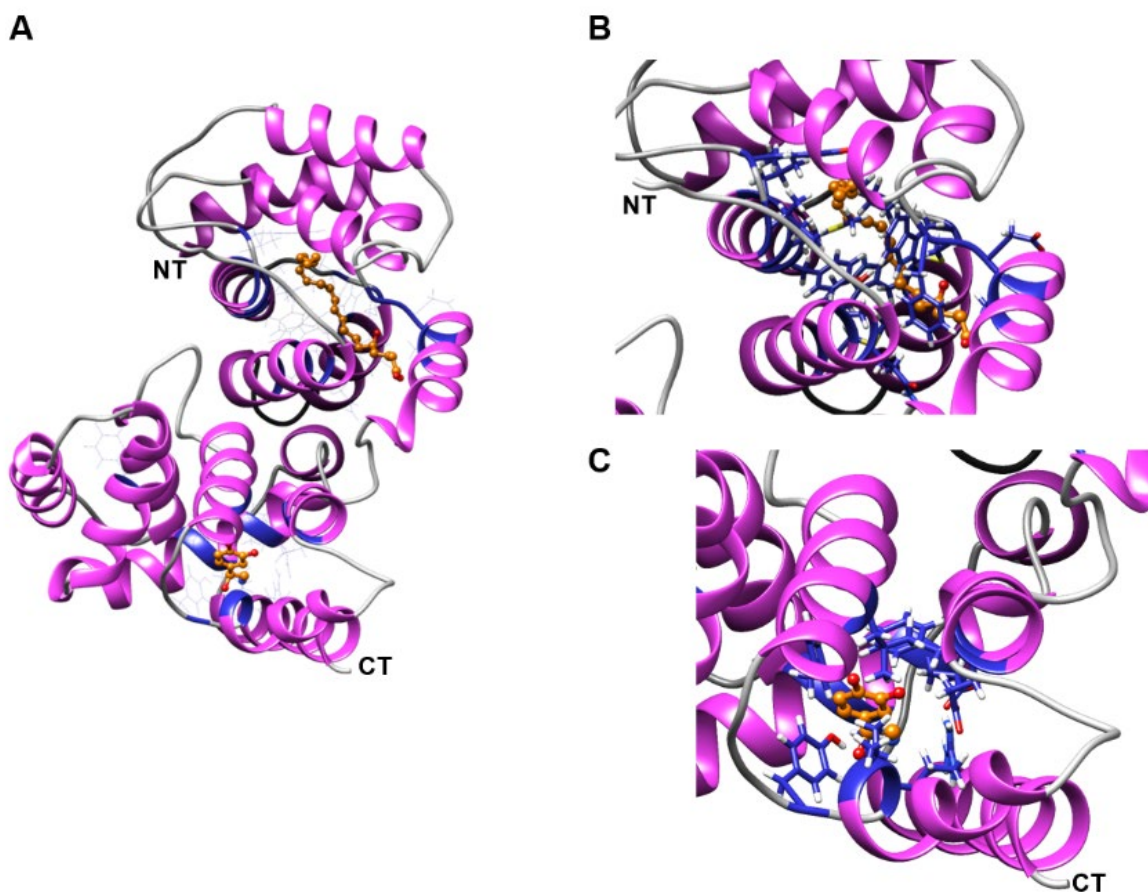

**Supplementary Fig. 2.** Binding pockets prediction of AlboD7L1 for eicosanoids and biogenic amines. (A) Ribbon representation of AlboD7L1 protein structure model shows the potential amino acids involved in leukotriene E<sub>4</sub> and norepinephrine represented in blue and shown as wires. (B) Detail of the predicted leukotriene E<sub>4</sub> binding pocket based on similarity with AeD7L1 (PBD ID: 3DZT) that corresponded to the dotted area in Fig. S2. (C) Detail of the predicted norepinephrine binding pocket based on similarity with AeD7L1 (PBD ID: 3DYE) that corresponded to the dotted area in Fig S2. Ligands are represented in orange as balls and sticks. N-terminal and C-terminal are labelled as NT and CT, respectively.

### Supplementary Fig. 3.

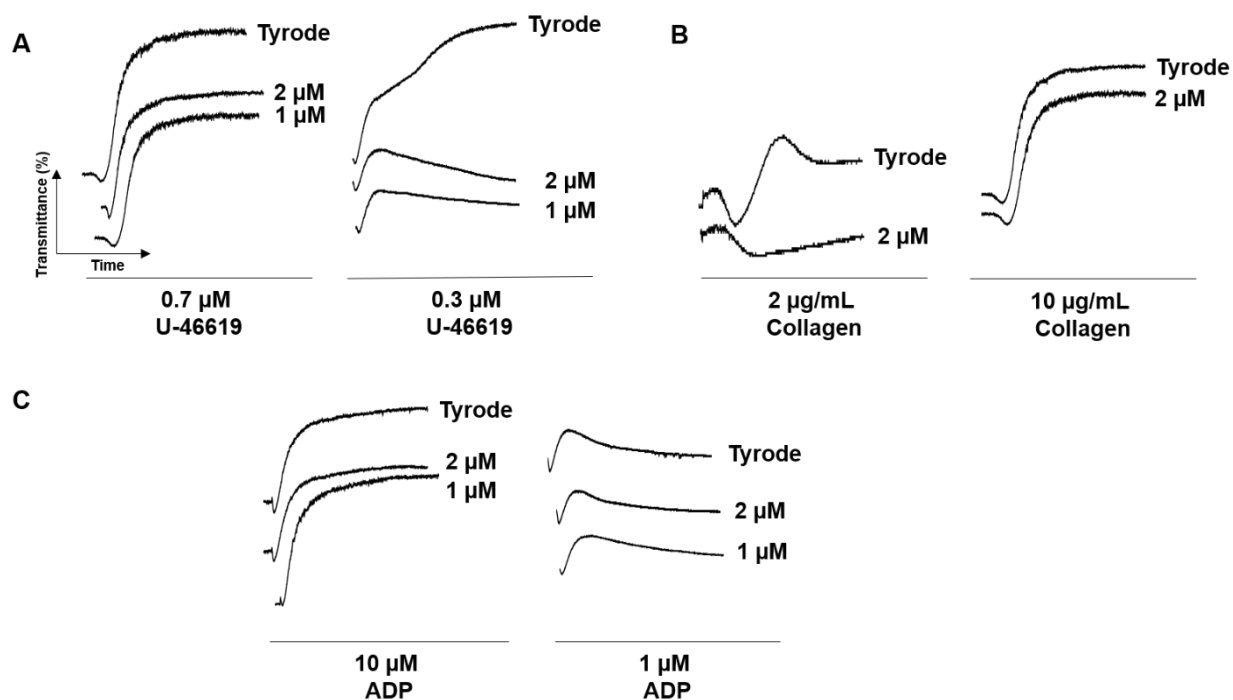

**Supplementary Fig. 3.** AlboD7L1 inhibits pro-aggregatory effects of the thromboxane A2 analog U-46619, low doses of collagen but not ADP. (A) AlboD7L1 does not inhibit high doses of U-46619 while it prevented aggregation triggered by lower doses of U-46619. (B) AlboD7L1 inhibits low doses of collagen-mediated aggregation (2  $\mu\text{g/mL}$ ) while it failed to prevent aggregation induced by high doses of collagen (10  $\mu\text{g/mL}$ ). (C) AlboD7L1 did not prevent aggregation induced by ADP. Control samples are indicated as Tyrode (vehicle). A Chrono-Log aggregometer model 700 was used.

### References from Supplementary material

1. Calvo, E.; Mans, B.J.; Ribeiro, J.M.; Andersen, J.F. Multifunctionality and mechanism of ligand binding in a mosquito antiinflammatory protein. *Proc Natl Acad Sci U S A* **2009**, *106*, 3728-3733, doi:10.1073/pnas.0813190106.
2. Calvo, E.; Mans, B.J.; Andersen, J.F.; Ribeiro, J.M. Function and evolution of a mosquito salivary protein family. *J Biol Chem* **2006**, *281*, 1935-1942, doi:10.1074/jbc.M510359200.
3. Martin-Martin, I.; Kern, O.; Brooks, S.; Smith, L.A.; Valenzuela-Leon, P.C.; Bonilla, B.; Ackerman, H.; Calvo, E. Biochemical characterization of AeD7L2 and its physiological relevance in blood feeding in the dengue mosquito vector, *Aedes aegypti*. *FEBS J* **2020**, 10.1111/febs.15524, doi:10.1111/febs.15524.
4. Martin-Martin, I.; Paige, A.; Valenzuela Leon, P.C.; Gittis, A.G.; Kern, O.; Bonilla, B.; Chagas, A.C.; Ganesan, S.; Smith, L.B.; Garboczi, D.N., et al. ADP binding by the *Culex quinquefasciatus* mosquito D7 salivary protein enhances blood feeding on mammals. *Nat Commun* **2020**, *11*, 2911, doi:10.1038/s41467-020-16665-z.
5. Alvarenga, P.H.; Francischetti, I.M.; Calvo, E.; Sa-Nunes, A.; Ribeiro, J.M.; Andersen, J.F. The function and three-dimensional structure of a thromboxane A2/cysteinyl leukotriene-binding protein from the saliva of a mosquito vector of the malaria parasite. *PLoS Biol* **2010**, *8*, e1000547, doi:10.1371/journal.pbio.1000547.
